# Supplementary material for: Three-dimensional macroporous gold electrodes superior to conventional gold disk electrodes in the construction of an electrochemical immunobiosensor for Staphylococcus aureus detection
Source: Royal Society of Chemistry journal article supplement (doi:10.1039/c9an02392e), 2020-01-01
Supplement: c9an02392e1.pdf [file c9an02392e1.pdf]

**Three-dimensional macroporous gold superior to  
conventional gold disk electrode in the construction of  
electrochemical immunobiosensor for *Staphylococcus  
aureus* detection**

Hui Wang, Xiao Zhao, Hui Yang, Lin Cao, Wenfang Deng, Yueming Tan\*, and Qingji Xie

Key Laboratory of Chemical Biology and Traditional Chinese Medicine Research (Ministry  
of Education of China), College of Chemistry and Chemical Engineering, Hunan Normal  
University, Changsha 410081, China

\*Corresponding author.

E-mail address: tanyueming0813@hunnu.edu.cn

### **Instrumentation and reagents**

Transmission electron microscopy (TEM) images were obtained with a Philips TECNAI F-30 transmission electron microscope. Scanning electron microscopy (SEM) images were obtained with a JSM-6360 field emission scanning electron microscope. Fourier transform infrared (FTIR) spectra were collected on Nicolet Nexus 670 Fourier transform infrared spectrometer. Ultraviolet-visible (UV-Vis) absorption spectra were recorded on UV-2450 spectrometer. Nitrogen adsorption and desorption isotherms and pore size distribution spectra were collected on Tristar 3000 automatic specific surface area and pore analyzer. All electrochemical experiments were performed on a CHI760E electrochemical workstation in a three-electrode system. The three-electrode system consists of a modified Au electrode (diameter 3 mm) as the working electrode, a KCl-saturated calomel electrode (SCE) as the reference electrode, and a Pt wire as the counter electrode.

1-Ethyl-3-(3-dimethylaminopropyl) carbodiimide (EDC), N-hydroxysuccinimide (NHS), and bovine serum albumin (BSA) were purchased from Sigma-Aldrich. Chitosan (CS), chloroauric acid, tetraethyl silicate, and silver nitrate were purchased from Aladdin Chemistry. Nitric acid, sulfuric acid, potassium nitrate, ammonia, ethanol, ether, sodium chloride, sodium dihydrogen phosphate, disodium hydrogen phosphate, hydrochloric acid, sodium hydroxide, potassium chloride, acetic acid and hydrogen peroxide are purchased from China National Pharmaceutical Group Co., Ltd. (Shanghai, China). Baird-Parker agar plates and sodium chloride broth (7.5 wt.%) were purchased from Qingdao Haibo Biological Company. 3-aminopropyltriethoxysilane (APTES, 98 wt.%) was purchased from Macleans. Calf intestinal ALP and L-ascorbic acid-2-phosphate trisodium salt (AAP) were purchased from Beijing

Libing Biotechnology Co., Ltd. Phosphate buffer solution (PBS, 10 mM NaH<sub>2</sub>PO<sub>4</sub>-Na<sub>2</sub>HPO<sub>4</sub>, pH 7.4) used in the experiments was autoclaved at 125 °C for 30 min and the storage time was less than three weeks. Bacterial suspensions of different concentration gradients were configured using sterilized PBS. *S. aureus*, *Escherichia coli* O157:H7 (*E. coli* O157:H7), *Escherichia coli* K12 (*E. coli* K12), and *L. monocytogenes* were purchased from the United States Culture Collection (ATCC, USA). Anti-*S. aureus* polyclonal antibody (molecular weight: 40-60 kDa) was purchased from Beijing Boaosen Biological Co., Ltd. All other reagents were analytical grade and without further purification. Milli-Q ultrapure water (Millipore,  $\geq 18$  M $\Omega$  cm) was used throughout.

### **Bacterial growth**

*S. aureus*, *E. coli* O157:H7 and *E. coli* K12 grew in sterile Luria-Bertani (LB) media (2.0 g bacto-tryptone, 1.0 g bacto-yeast extract powder, 2.0 g NaCl dissolving in 200 mL distilled water, and adjusted to pH 7.4 with 3.0 M NaOH) in an incubator-shaker at 37 °C to reach the growing stationary phase. After overnight incubation, 1 mL of bacterial cells was centrifuged (6000 rpm, 10 min) to remove the supernatant and washed 3 times with PBS (0.1 M, pH 7.4), and resuspended in 1 mL of PBS. Howbeit, *L. monocytogenes* grew in Nutrient-Broth (NB) media (2.0 g bacto-peptone, 0.6 g bacto-beef extract, 1.0 g NaCl dissolving in 200 mL distilled water, and adjusted to pH 7.4 with 3.0 M NaOH). By plating bacteria on LB or NB plates, the amount of bacteria per milliliter can be acquired by counting related colony forming units (CFU) after incubation overnight at 37 °C.

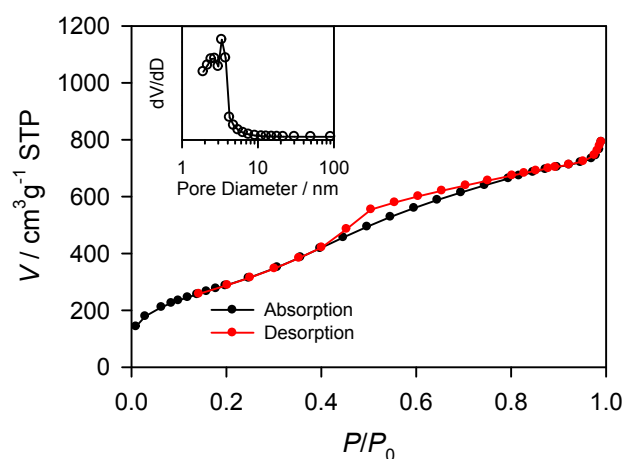

**Fig. S1** Nitrogen adsorption and desorption isotherms of MSNs. Inset shows pore size distribution curve.

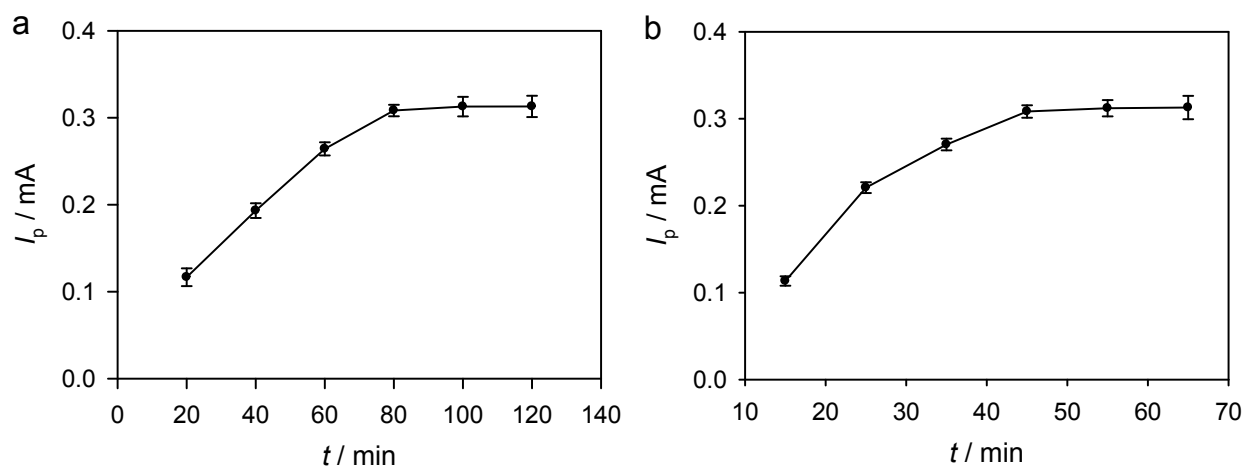

**Fig. S2** The effects of *S. aureus* capture time (a) and ALP-MSNs-Ab<sub>2</sub> labeling time (b) on the resulting current responses for the detection of *S. aureus* ( $10^3 \text{ CFU mL}^{-1}$ ).

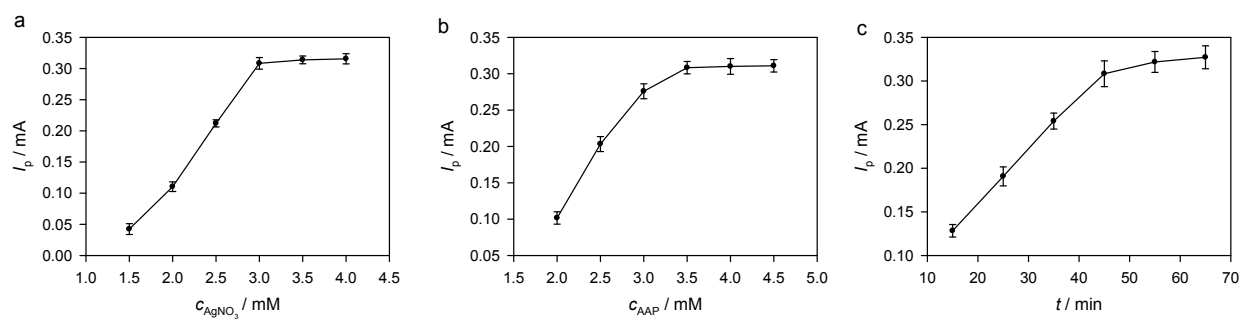

**Fig. S3** The effects of  $\text{AgNO}_3$  concentration (a), AAP concentration (b), and enzymatic reaction time (c) on the resulting current responses for the detection of *S. aureus* ( $10^3$  CFU  $\text{mL}^{-1}$ ).

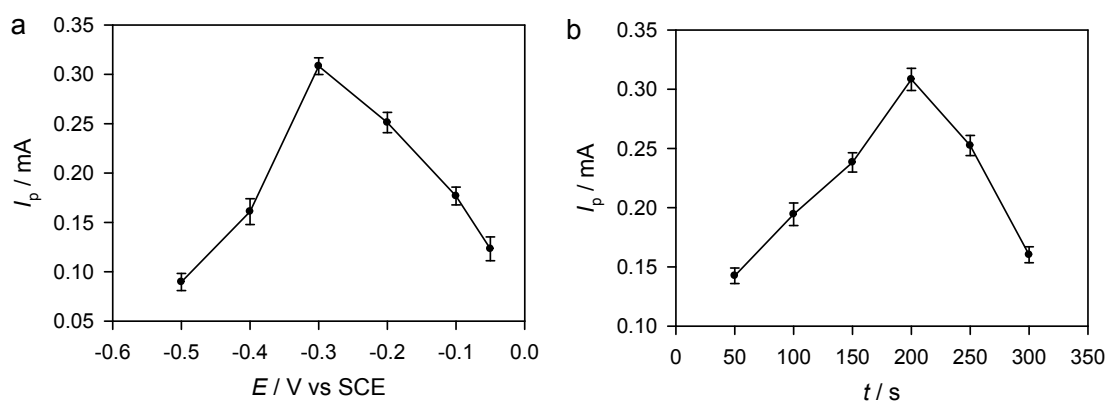

**Fig. S4** The effects of deposition potential (a) and deposition time (b) on the resulting current responses for the detection of *S. aureus* ( $10^3$  CFU  $\text{mL}^{-1}$ ).

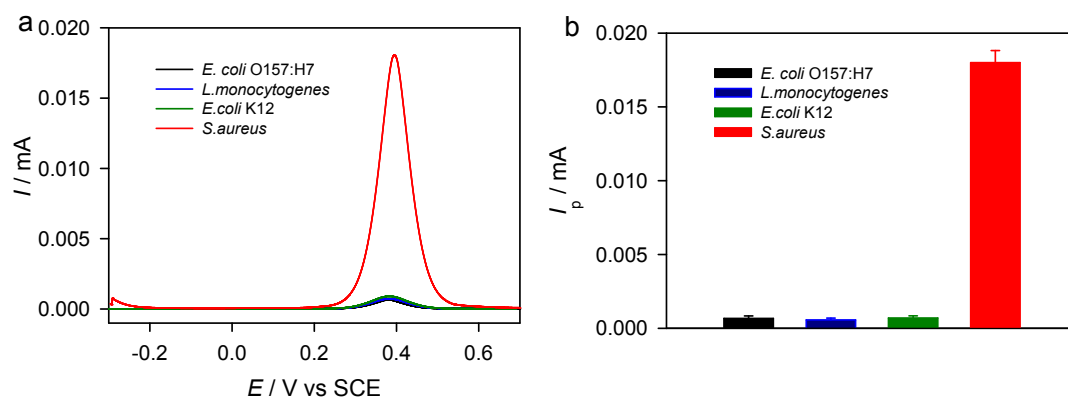

**Fig. S5** DPVs (a) and peak currents (b) for detecting different pathogens the Au disk electrode-based biosensor. The concentrations of all pathogens are  $10^3$  CFU mL<sup>-1</sup>.

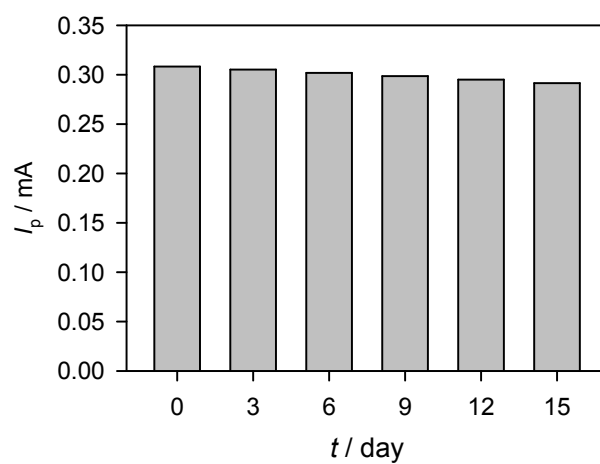

**Fig. S6** Current responses for the detection of  $10^3$  CFU mL<sup>-1</sup> *S. aureus* by 6 immunoelectrodes (prepared under the same conditions) at different time.

**Table S1.** Performance comparison of the detection of *S. aureus* in the literature.

| Detection Method                                  | Linear range<br>(CFU mL <sup>-1</sup> )  | Detection limit<br>(CFU mL <sup>-1</sup> ) | Ref       |
|---------------------------------------------------|------------------------------------------|--------------------------------------------|-----------|
| Electrochemical impedance spectroscopy            | 10-10 <sup>7</sup>                       | 10                                         | 1         |
| Electrochemical piezoelectric quartz crystal      | 42-4.1×10 <sup>5</sup>                   | 41                                         | 2         |
| Electrochemical impedance spectroscopy            | 10-10 <sup>6</sup>                       | 10                                         | 3         |
| Electrochemical impedance spectroscopy            | 10 <sup>2</sup> -10 <sup>7</sup>         | 100                                        | 4         |
| Amperometric detection                            | 10-10 <sup>8</sup>                       | 10                                         | 5         |
| Amperometric detection                            | 4.4×10 <sup>5</sup> -1.8×10 <sup>7</sup> | 1.7×10 <sup>5</sup>                        | 6         |
| Potentiometric detection                          | 10 <sup>3</sup> -10 <sup>8</sup>         | 8×10 <sup>2</sup>                          | 7         |
| Conductometric detection                          | 4.1×10 <sup>3</sup> -4.1×10 <sup>8</sup> | 4.1×10 <sup>3</sup>                        | 8         |
| Differential pulse voltammetric detection         | 10-10 <sup>7</sup>                       | 1                                          | 9         |
| Roll-to-roll point of care electrochemical device | -                                        | 200                                        | 10        |
| Electrochemiluminescence                          | 1.0×10 <sup>3</sup> -1.0×10 <sup>9</sup> | 3.1×10 <sup>2</sup>                        | 11        |
| Colorimetry                                       | 50-10 <sup>4</sup>                       | 20                                         | 12        |
| Colorimetry                                       | 10-2000                                  | 10                                         | 13        |
| Surface-enhanced Raman scattering                 | 50-800                                   | 17.8                                       | 14        |
| Fluorescence                                      | 80-8×10 <sup>6</sup>                     | 39                                         | 15        |
| Polymerase chain reaction                         | 5.0×10 <sup>1</sup> -5.0×10 <sup>8</sup> | 50                                         | 16        |
| Differential pulse voltammetric detection         | 5-10 <sup>9</sup>                        | 2                                          | This work |



**Table S2.** Results for detection of *S. aureus* in milk samples using 3DMG electrode-based biosensor and Au disk electrode-based biosensor.

| Samples | 3DMG electrode-based biosensor |                    |                    |          | Au disk electrode-based biosensor |                    |                    |          |
|---------|--------------------------------|--------------------|--------------------|----------|-----------------------------------|--------------------|--------------------|----------|
|         | Original                       | Added              | Found              | Recovery | Original                          | Added              | Found              | Recovery |
|         | (CFU                           | (CFU               | (CFU               | (%)      | (CFU                              | (CFU               | (CFU               | (%)      |
|         | mL <sup>-1</sup> )             | mL <sup>-1</sup> ) | mL <sup>-1</sup> ) |          | mL <sup>-1</sup> )                | mL <sup>-1</sup> ) | mL <sup>-1</sup> ) |          |
| Milk #1 | Not found                      | 10                 | 9±1                | 90       | Not found                         | 10                 | -                  | -        |
|         | Not found                      | 100                | 95±5               | 95       | Not found                         | 100                | 93±5               | 93       |
|         | Not found                      | 1000               | 970±20             | 97       | Not found                         | 1000               | 1020±30            | 102      |
| Milk #2 | Not found                      | 10                 | 9±2                | 90       | Not found                         | 10                 | -                  | -        |
|         | Not found                      | 100                | 105±10             | 105      | Not found                         | 100                | 108±10             | 108      |
|         | Not found                      | 1000               | 1020±20            | 102      | Not found                         | 1000               | 1010±50            | 101      |

**Table S3.** Results for detection of *S. aureus* in milk samples with the 3DMG electrode-based biosensor and a reported method that combines immunomagnetic separation with fluorescent immunoassay.<sup>17</sup>

| Samples | 3DMG electrode-based biosensor         |                                     |                                     |                 | Immunomagnetic separation -<br>fluorescent immunoassay |                                     |                                     |                 |
|---------|----------------------------------------|-------------------------------------|-------------------------------------|-----------------|--------------------------------------------------------|-------------------------------------|-------------------------------------|-----------------|
|         | Original<br>(CFU<br>mL <sup>-1</sup> ) | Added<br>(CFU<br>mL <sup>-1</sup> ) | Found<br>(CFU<br>mL <sup>-1</sup> ) | Recovery<br>(%) | Original<br>(CFU<br>mL <sup>-1</sup> )                 | Added<br>(CFU<br>mL <sup>-1</sup> ) | Found<br>(CFU<br>mL <sup>-1</sup> ) | Recovery<br>(%) |
| Milk#1  | Not<br>found                           | 10                                  | 9±1                                 | 90              | Not<br>found                                           | 10                                  | 9±2                                 | 90              |
|         |                                        | 100                                 | 95±5                                | 95              |                                                        | 100                                 | 98±10                               | 98              |
|         |                                        | 1000                                | 970±20                              | 97              |                                                        | 1000                                | 1040±20                             | 104             |
| Milk#2  | Not<br>found                           | 10                                  | 9±2                                 | 90              | Not<br>found                                           | 10                                  | 9±3                                 | 90              |
|         |                                        | 100                                 | 105±10                              | 105             |                                                        | 100                                 | 108±10                              | 108             |
|         |                                        | 1000                                | 1020±20                             | 102             |                                                        | 1000                                | 950±50                              | 95              |

## References

1. K. Bekir, H. Barhoumi, M. Braiek, A. Chrouda, N. Zine, N. Abid, A. Maaref, A. Bakhrouf, H. Ben Ouada, N. Jaffrezic-Renault and H. Ben Mansour, *Environ.Sci. Pollut. Res.*, 2015, **22**, 15796-15803.
2. Y. Lian, F. He, H. Wang and F. Tong, *Biosens. Bioelectron.*, 2015, **65**, 314-319.
3. F. Jia, N. Duan, S. Wu, X. Ma, Y. Xia, Z. Wang and X. Wei, *Microchim. Acta*, 2014, **181**, 967-974.
4. J. H. Yoon, Y. D. Han, P. C. Lee and H. C. Yoon, *Biochip J.*, 2013, **7**, 344-352.
5. T. Majumdar, R. Chakraborty and U. Raychaudhuri, *Food Biosci.*, 2013, **4**, 38-45.
6. V. Escamilla-Gomez, S. Campuzano, M. Pedrero and J. M. Pingarron, *Anal. Bioanal. Chem.*, 2008, **391**, 837-845.
7. G. A. Zelada-Guillén, J. L. Sebastián-Avila, P. Blondeau, J. Riu and F. X. Rius, *Biosens. Bioelectron.*, 2012, **31**, 226-232.
8. X. Zhang, X. Wang, Q. Yang, X. Jiang, Y. Li, J. Zhao and K. Qu, *Microchim. Acta*, 2020, **187**.
9. A. Abbaspour, F. Norouz-Sarvestani, A. Noori and N. Soltani, *Biosens. Bioelectron.*, 2015, **68**, 149-155.
10. M. Safavieh, M. U. Ahmed and M. Zourob, *Sensors*, 2013, 1-4.
11. H. Yue, Y. Zhou, P. Wang, X. Wang, Z. Wang, L. Wang and Z. Fu, *Talanta*, 2016, **153**, 401-406.
12. S. Wang, W. Deng, L. Yang, Y. Tan, Q. Xie and S. Yao, *Acs Appl. Mater. Interfaces*, 2017, **9**, 24440-24445.

13. H. Shen, J. Wang, H. Liu, Z. Li, F. Jiang, F.-B. Wang and Q. Yuan, *ACS Appl. Mater. Interfaces*, 2016, **8**, 19371-19378.
14. A. Zhang, G. Tao and J. Wang, *J. Nanopart. Res.*, 2018, **20**.
15. R. Cai, F. Yin, Z. Zhang, Y. Tian and N. Zhou, *Anal. Chim. Acta*, 2019, **1075**, 128-136.
16. Y. Zeng, Y. Wan and D. Zhang, *Microchim. Acta*, 2016, **183**, 741-748.
17. W. Deng, C. Cheng, H. Yang, H. Wang, Y. Tan, Q. Xie, M. Ma and S. Yao, *Talanta*, 2019, **202**, 244-250.
